# Supplementary material
Source: PubMed Central journal article supplement (PMC5826168)
Supplement: AAC.01924-17_zac003186944s1.pdf [file AAC.01924-17_zac003186944s1.pdf]

1 **Supplementary information**

2 Yu et al. Deletion of *ADA2* increases antifungal drug susceptibility and virulence in *Candida*  
3 *glabrata*

4  
5 **Table S1. PCR primers used in this study**

| Primer | Use                                    | Sequence (5' to 3')                                                  |
|--------|----------------------------------------|----------------------------------------------------------------------|
| JC765  | 3' NCR of <i>ADA2</i>                  | <u>GTGGTAATTATTACTATTTACAATCAAAGGTGGTCCTT</u><br>GGTTAGCTTAAGGTCATGG |
| JC644  | 3' NCR of <i>ADA2</i>                  | CAAAGAACGCTGTGAATTCC                                                 |
| JC641  | 5' NCR of <i>ADA2</i>                  | TCAGGGCTAAACACTTGCAT                                                 |
| JC764  | 5' NCR of <i>ADA2</i>                  | <u>TCGTTTTCTTTATTATTCTCTAGTTTTGACGCGTGATTGA</u><br>AATTCACCAGC       |
| JC723  | <i>SAT1</i> marker                     | CGTCAAAACTAGAGAATAA                                                  |
| JC724  | <i>SAT1</i> marker                     | AGGACCACCTTTGATTGT                                                   |
| JC647  | <i>ADA2</i> ORF                        | TTCATTGTGACGTGTGCTCA                                                 |
| JC648  | <i>ADA2</i> ORF                        | CTTTTCAGCACGAACTGTCAA                                                |
| JC820  | <i>ADA2</i> 5' disruption confirmation | TCTGTCTGCTACCAAAGAAGA                                                |
| JC821  | <i>ADA2</i> 3' disruption confirmation | TGTGGATGTGTGGATAAGTTG                                                |
| JC887  | 3' NCR of <i>ADA2</i> (SacII)          | aaaccgeggCATGGTTTACATAACCAATGG                                       |
| JC888  | 3' NCR of <i>ADA2</i> (SacI)           | aaagagctcCAAAGAACGCTGTGAATTCC                                        |
| JC885  | 5' NCR of <i>ADA2</i> (KpnI)           | aaaggtaccTCAGGGCTAAACACTTGCAT                                        |
| JC886  | 5' NCR of <i>ADA2</i> (ApaI)           | aaagggcccCGTGATTGAAATTCACCAGC                                        |
| JC893  | <i>ADA2</i> complementation            | aaggtaccATACCGTTTTTTTTTACGCGA                                        |
| JC894  | <i>ADA2</i> complementation            | aaaagcttTCATATCCAATGCTGTAGTTG                                        |
| JC48   | Disruption confirmation                | ACAATCAAAGGTGGTCCT                                                   |
| JC81   | Disruption confirmation                | AACTTCCTCGAGGGGGGGCC                                                 |
| JC974  | 3' NCR of <i>ERG6</i> (SacII)          | aaaccgeggTGCAGCATAACTATATTCACA                                       |
| JC975  | 3' NCR of <i>ERG6</i> (SacI)           | aaagagctcTGGCAAGGCTGACTCTGGTAT                                       |
| JC972  | 5' NCR of <i>ERG6</i> (KpnI)           | aaaggtaccTTCTGTGCCAAGGCCTTTTT                                        |
| JC973  | 5' NCR of <i>ERG6</i> (ApaI)           | aaagggcccTCCTTCTGTATTAGTATCGGG                                       |
| JC1078 | <i>ERG6</i> ORF                        | TTTGGAGGACTACAACGAGGC                                                |
| JC1079 | <i>ERG6</i> ORF                        | GACGGTGAACATCTTTGGAA                                                 |
| JC1080 | <i>ERG6</i> 5' disruption confirmation | CTTGTCCCTGGCGTGTCTAA                                                 |
| JC1081 | <i>ERG6</i> 3' disruption confirmation | TGTTGCTGAGAGAAGAAGCTG                                                |

|        |                       |                          |
|--------|-----------------------|--------------------------|
| JC370  | qPCR <i>ACT1</i> ORF  | GTACCACCATGTTCCCAGGT     |
| JC371  | qPCR <i>ACT1</i> ORF  | ACCACCGATCCAGACAGAGT     |
| JC851  | qPCR <i>GAS3</i> ORF  | ACTTGATTGCCCGGAGAAAA     |
| JC852  | qPCR <i>GAS3</i> ORF  | GGTAATGCCAGGCAAGGTAATAAT |
| JC853  | qPCR CAGL0L01771g     | CAGTCGCTGGAGATGGTAAGG    |
| JC854  | qPCR CAGL0L01771g     | ACCACCGACACGCCATTAG      |
| JC855  | qPCR CAGL0G05269g     | TCACTTGAAGAAAGACCAAAATGC |
| JC856  | qPCR CAGL0G05269g     | GGTGCTCTTACCGTGTTCAGTT   |
| JC873  | qPCR <i>ADA2</i> ORF  | GCCTCCGTGCCGTCTTG        |
| JC874  | qPCR <i>ADA2</i> ORF  | CCAAAGGTTGATCATCTGGTTCA  |
| JC875  | qPCR <i>ERG6</i> ORF  | CAACAACGACTACCAGATCCAAAA |
| JC876  | qPCR <i>ERG6</i> ORF  | TTGGCTCAAACCTCCATGTTCAT  |
| JC1042 | qPCR <i>EPA23</i> ORF | TGATACTTCCCCCAAAAACG     |
| JC1043 | qPCR <i>EPA23</i> ORF | TGGTTCACTTGATATGGCTGATG  |
| JC1044 | qPCR <i>YPS4</i> ORF  | GTTTGGCTTGGCTGCTTTCT     |
| JC1045 | qPCR <i>YPS4</i> ORF  | TCTAGAGCCATTGGCAGCAA     |
| JC1046 | qPCR <i>EPA20</i> ORF | TGTCAAGCCATCCAGTTCAGTT   |
| JC1047 | qPCR <i>EPA20</i> ORF | TAACCGTCTGTACATATCGTTGCA |
| JC1048 | qPCR <i>YPS10</i> ORF | GGACACGGGTTCGTCTGATT     |
| JC1049 | qPCR <i>YPS10</i> ORF | TGCATCTAAGGAGGCAATGCT    |

---

6 \*Complementary sequences to *SAT1* gene sequences are underlined.

7 #Lowercase letters represent restriction enzyme cutting sites and three adenine nucleotides to protect  
8 primers.

9

10

11

12

13

14

15

16

17

18

19

20

21 **Table S2. Plasmids used in this study**

| Plasmid | Relevant insert                | Parent |
|---------|--------------------------------|--------|
| pSFS2A  |                                | (1)    |
| pYSJ32  | 3'NCR of <i>CgADA2</i>         | pSFS2A |
| pYSJ36  | 5'NCR of <i>CgADA2</i>         | pYSJ32 |
| pYSJ46  | 5'NCR and ORF of <i>CgADA2</i> | pYSJ32 |
| pYSJ89  | 3'NCR of <i>CgERG6</i>         | pSFS2A |
| pYSJ91  | 5'NCR of <i>CgERG6</i>         | pYSJ89 |

22

23 Reference

- 24 1. **Reuß O, Vik Å, Kolter R, Morschhäuser J.** 2004. The *SAT1* flipper, an optimized tool for  
 25 gene disruption in *Candida albicans*. *Gene* **341**:119-127.

26

27

28

29

30

31

32

33

34

35

36

37

38

39 **Figure S1**

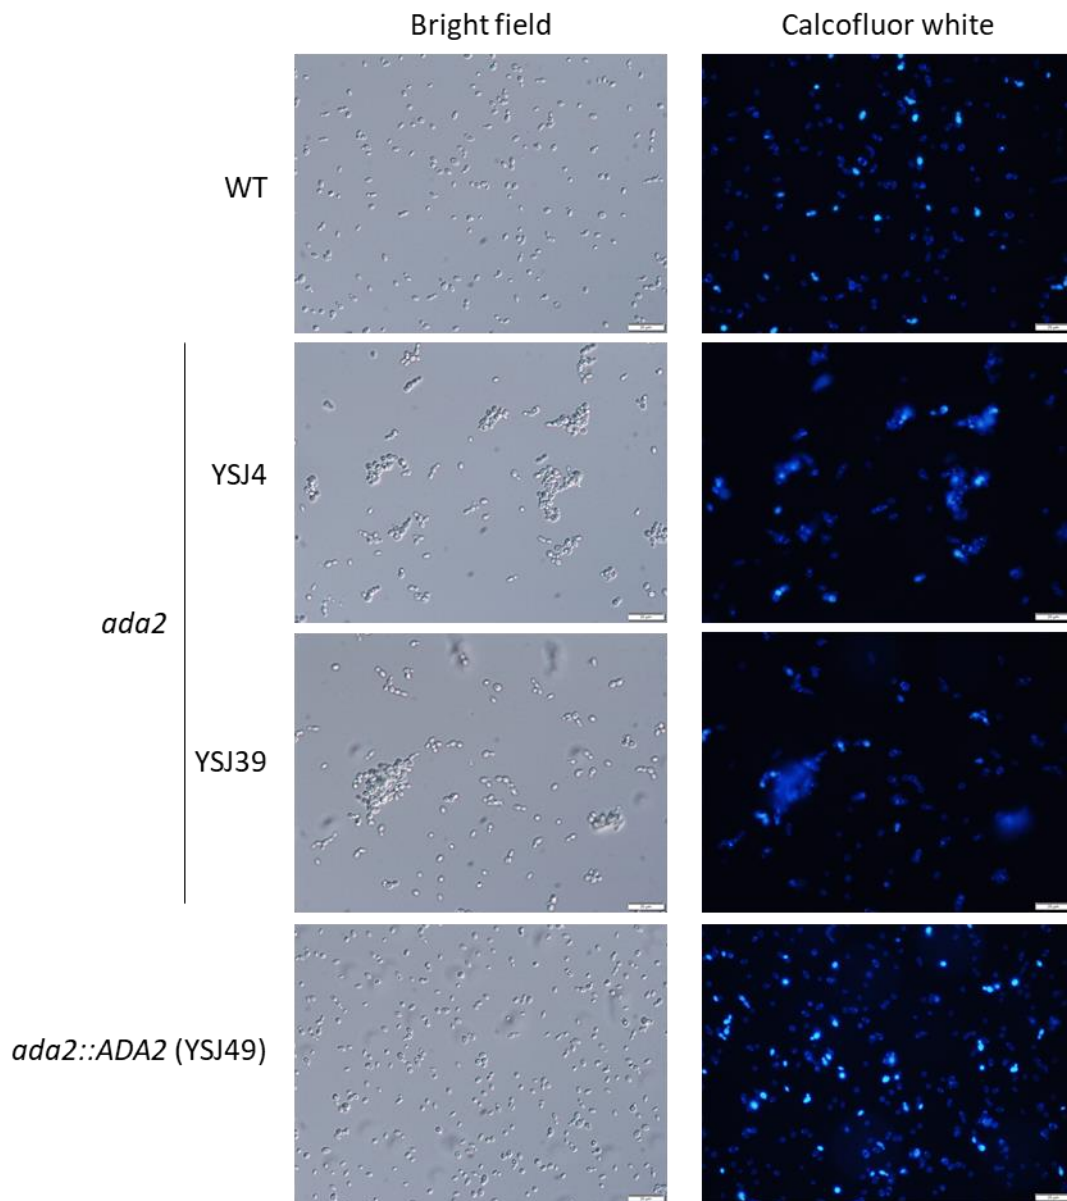

40

41 **Figure S1.** The *ada2* mutants exhibited clumping phenotypes. Strains were grown for 18 h in liquid  
42 YPD medium at 37°C with shaking, washed twice with dH<sub>2</sub>O, stained with 1 mg/mL calcofluor white  
43 for 5 min, and washed once with dH<sub>2</sub>O before microscopic observation. The scale bar represents 20  
44 μm.

45

46

47 **Figure S2**

48

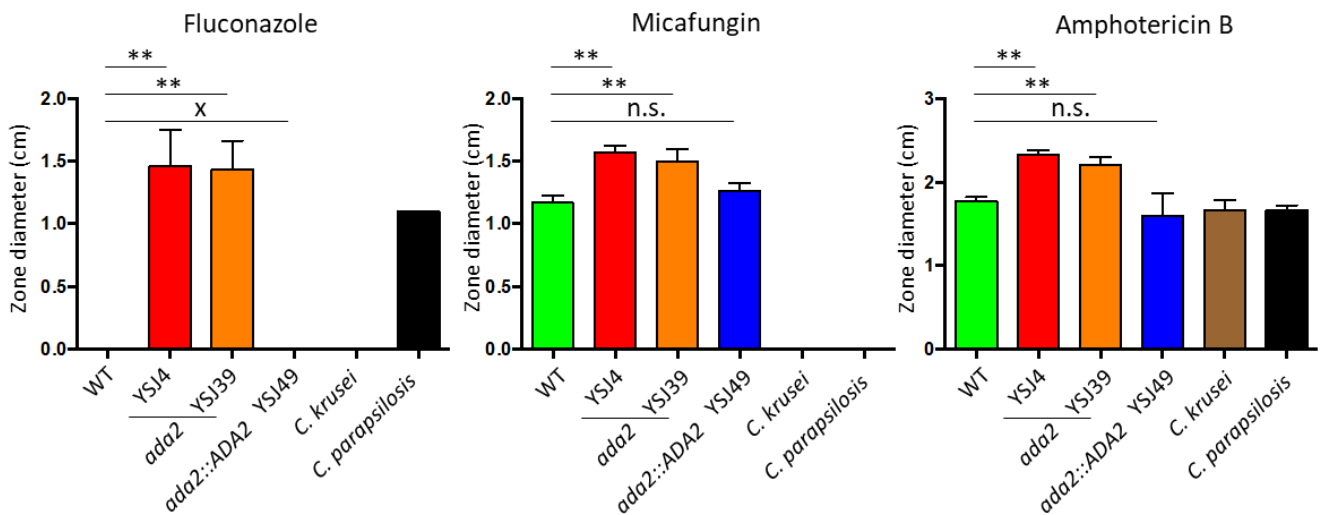

49

50 **Figure S2.** Bar graphs of disk diffusion assays. The histogram represents the diameter of inhibitory  
51 zone of fluconazole, micafungin, and amphotericin B against *Candida* strains. *Candida* cells were  
52 plated onto Mueller Hinton medium containing 2% glucose and 0.5  $\mu\text{g/mL}$  methylene blue. The disks  
53 containing 20  $\mu\text{g}$  FLC, 40 ng MCF, or 2.5  $\mu\text{g}$  AmB were placed on the agar surface and incubated  
54 at 35°C for 24 h. The data shown were calculated from three technical replicates. Data represent the  
55 mean  $\pm$  standard error of the mean. The statistical analyses of *P* values were determined by the unpaired  
56 *t* test. \*\**P* < 0.001; “x” unable to determine; “n.s.” not significant.
